- a single dose of etomidate in critically ill patients. *Intensive Care Med* 2008; 34:714–9
32. Watt I, Ledingham IM: Mortality amongst multiple trauma patients admitted to an intensive therapy unit. *Anaesthesia* 1984; 39:973–81
  33. Beishuizen A, Thijs LG: Endotoxin and the hypothalamo-pituitary-adrenal (HPA) axis. *J Endotoxin Res* 2003; 9:3–24
  34. Marik PE, Zaloga GP: Adrenal insufficiency in the critically ill: A new look at an old problem. *Chest* 2002; 122:1784–96
  35. Forman SA: Clinical and molecular pharmacology of etomidate. *ANESTHESIOLOGY* 2011; 114:695–707
  36. Glenister DW, Yates FE: Sex difference in the rate of disappearance of corticosterone-4-C14 from plasma of intact rats: Further evidence for the influence of hepatic delta4-steroid hydrogenase activity on adrenal cortical function. *Endocrinology* 1961; 68:747–58
  37. Goujon E, Parnet P, Layé S, Combe C, Dantzer R: Adrenalectomy enhances pro-inflammatory cytokines gene expression, in the spleen, pituitary and brain of mice in response to lipopolysaccharide. *Brain Res Mol Brain Res* 1996; 36:53–62
  38. Morrow LE, McClellan JL, Conn CA, Kluger MJ: Glucocorticoids alter fever and IL-6 responses to psychological stress and to lipopolysaccharide. *Am J Physiol* 1993; 264(5 Pt 2):R1010–6
  39. Haddad JJ, Saadé NE, Safieh-Garabedian B: Cytokines and neuro-immune-endocrine interactions: A role for the hypothalamic-pituitary-adrenal revolving axis. *J Neuroimmunol* 2002; 133:1–19

## ANESTHESIOLOGY REFLECTIONS FROM THE WOOD LIBRARY-MUSEUM

### Monkshoods: Heart-stopping Neurotoxins behind Hanaoka's *Mafutsusan* (Year 1804, Part 2)

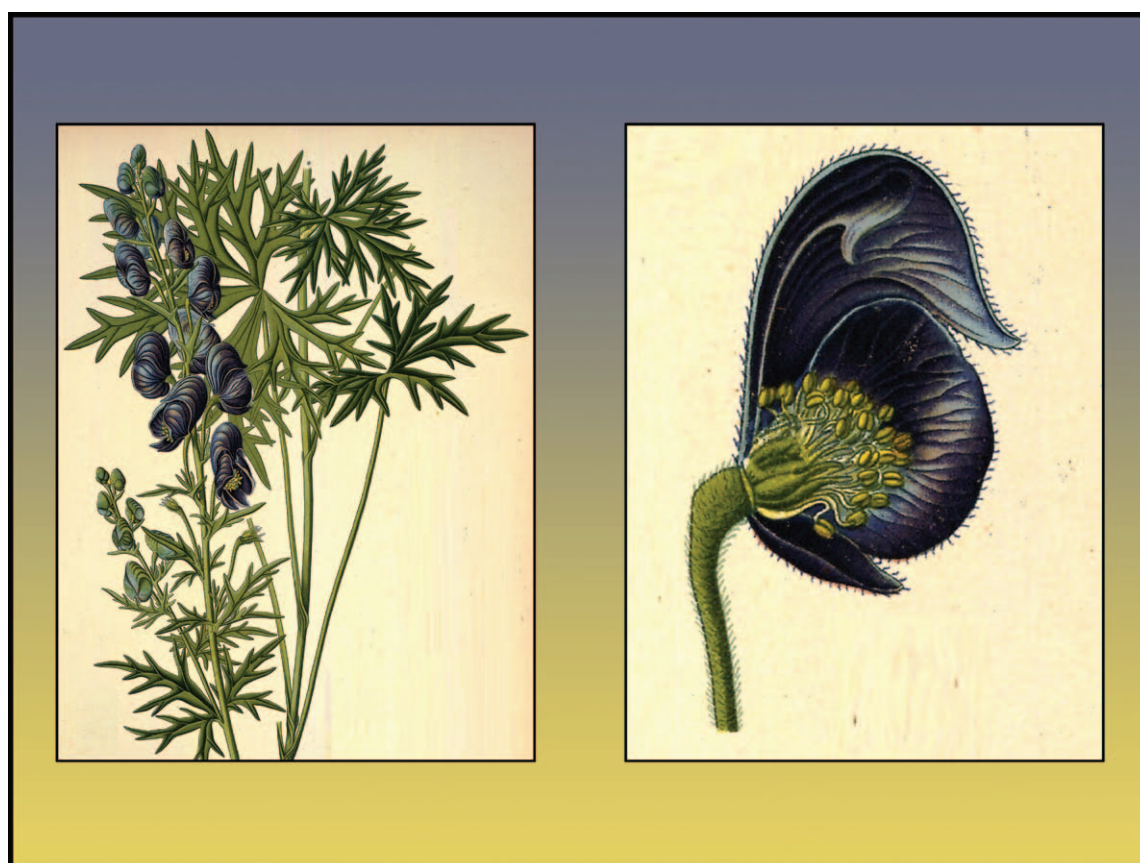

Widely regarded as the source for the deadliest Himalayan arrow poison, “monkshoods” (left) have flowers which resemble a monk’s hood or cowl (right). The deadly Blue Aconite is a monkshood with blue flowers, the color of which was likely reflected in the partially swallowed poison lodged eternally in “blue-throated Shiva,” Hinduism’s “God of All Poisons.” For mortals, just touching aconite to the gums might simultaneously alleviate a toothache and numb the fingers and mouth. Beyond their neurotoxicity, such species of the *Aconitum* genus are cardiotoxic and can slow the heart rate to a standstill—a useful attribute when poisoning wolves (“Wolfbane” is another aconitic nickname). To minimize patient mortality, Ayurvedic physicians typically soaked such *Aconitum* species in the urine or milk of sacred cows in order to weaken the poison. For pioneers of anesthesia such as China’s Hua Tuo (c. 140–c. 208) and Japan’s Seishū Hanaoka (1760–1835), the numbing aconitine of monkshoods provided the “pain dulling” portion of a primitive balanced anesthetic. (Copyright © the American Society of Anesthesiologists, Inc.)

George S. Bause, M.D., M.P.H., Honorary Curator, ASA’s Wood Library-Museum of Anesthesiology, Schaumburg, Illinois, and Clinical Associate Professor, Case Western Reserve University, Cleveland, Ohio. UJYC@aol.com.
